# Supplementary material for: Developing and Testing a Deep Learning Approach for Mapping Retrogressive Thaw Slumps
Source: MDPI journal article supplement (doi:10.3390/rs13214294), 2021-10-26
Supplement: s1 [file s1]

**Supplementary Table 1.** PlanetScope image\_ids used for ground truth collection as well as model training and validation.

|    | <b>image_id</b>         | <b>image_date</b> | <b>region</b> | <b>site</b>     |
|----|-------------------------|-------------------|---------------|-----------------|
| 0  | 20180703_192559_1006    | 2018-07-03        | Banks_Island  | Banks_Island_01 |
| 1  | 20180703_192600_1006    | 2018-07-03        | Banks_Island  | Banks_Island_01 |
| 2  | 20180825_164603_0f2a    | 2018-08-25        | Banks_Island  | Banks_Island_01 |
| 3  | 20180825_164604_0f2a    | 2018-08-25        | Banks_Island  | Banks_Island_01 |
| 4  | 20190704_172438_93_1067 | 2019-07-04        | Banks_Island  | Banks_Island_01 |
| 5  | 20190704_172440_99_1067 | 2019-07-04        | Banks_Island  | Banks_Island_01 |
| 6  | 20190726_193719_0f17    | 2019-07-26        | Banks_Island  | Banks_Island_01 |
| 7  | 20190726_193720_0f17    | 2019-07-26        | Banks_Island  | Banks_Island_01 |
| 8  | 20190726_193721_0f17    | 2019-07-26        | Banks_Island  | Banks_Island_01 |
| 9  | 20190904_193046_0e2f    | 2019-09-04        | Banks_Island  | Banks_Island_01 |
| 10 | 20190904_193047_0e2f    | 2019-09-04        | Banks_Island  | Banks_Island_01 |
| 11 | 20190904_193048_0e2f    | 2019-09-04        | Banks_Island  | Banks_Island_01 |
| 12 | 20180729_193040_0f43    | 2018-07-29        | Banks_Island  | Banks_Island_02 |
| 13 | 20180729_193041_0f43    | 2018-07-29        | Banks_Island  | Banks_Island_02 |
| 14 | 20190702_160541_0f49    | 2019-07-02        | Banks_Island  | Banks_Island_02 |
| 15 | 20190702_160542_0f49    | 2019-07-02        | Banks_Island  | Banks_Island_02 |
| 16 | 20190702_160543_0f49    | 2019-07-02        | Banks_Island  | Banks_Island_02 |
| 17 | 20190727_160820_1_1020  | 2019-07-27        | Banks_Island  | Banks_Island_02 |
| 18 | 20190910_194626_103e    | 2019-09-10        | Banks_Island  | Banks_Island_02 |
| 19 | 20190910_194627_103e    | 2019-09-10        | Banks_Island  | Banks_Island_02 |
| 20 | 20180921_203252_101f    | 2018-09-21        | Herschel      | Herschel_01     |
| 21 | 20190607_204203_1044    | 2019-06-07        | Herschel      | Herschel_01     |
| 22 | 20190607_204204_1044    | 2019-06-07        | Herschel      | Herschel_01     |
| 23 | 20190607_204205_1044    | 2019-06-07        | Herschel      | Herschel_01     |
| 24 | 20190619_203634_0f4e    | 2019-06-19        | Herschel      | Herschel_01     |
| 25 | 20190619_203635_0f4e    | 2019-06-19        | Herschel      | Herschel_01     |
| 26 | 20190621_204122_0f12    | 2019-06-21        | Herschel      | Herschel_01     |
| 27 | 20190621_204124_0f12    | 2019-06-21        | Herschel      | Herschel_01     |
| 28 | 20190902_203942_103b    | 2019-09-02        | Herschel      | Herschel_01     |
| 29 | 20190902_203943_103b    | 2019-09-02        | Herschel      | Herschel_01     |
| 30 | 20190622_164800_1048    | 2019-06-22        | Horton        | Horton_01       |
| 31 | 20190622_164801_1048    | 2019-06-22        | Horton        | Horton_01       |
| 32 | 20190622_164802_1048    | 2019-06-22        | Horton        | Horton_01       |
| 33 | 20190714_194358_1035    | 2019-07-14        | Horton        | Horton_01       |
| 34 | 20190714_194359_1035    | 2019-07-14        | Horton        | Horton_01       |
| 35 | 20190803_164437_1048    | 2019-08-03        | Horton        | Horton_01       |
| 36 | 20190803_164438_1048    | 2019-08-03        | Horton        | Horton_01       |
| 37 | 20190905_195022_1032    | 2019-09-05        | Horton        | Horton_01       |
| 38 | 20190905_195023_1032    | 2019-09-05        | Horton        | Horton_01       |
| 39 | 20190714_194400_1035    | 2019-07-14        | Horton        | Horton_02       |
| 40 | 20190727_194259_100c    | 2019-07-27        | Horton        | Horton_02       |

|    |                         |            |         |            |
|----|-------------------------|------------|---------|------------|
| 41 | 20190803_164435_1048    | 2019-08-03 | Horton  | Horton_02  |
| 42 | 20190803_164436_1048    | 2019-08-03 | Horton  | Horton_02  |
| 43 | 20190820_164142_0f21    | 2019-08-20 | Horton  | Horton_02  |
| 44 | 20190820_164143_0f21    | 2019-08-20 | Horton  | Horton_02  |
| 45 | 20190820_164144_0f21    | 2019-08-20 | Horton  | Horton_02  |
| 46 | 20190907_195118_1034    | 2019-09-07 | Horton  | Horton_02  |
| 47 | 20190907_195119_1034    | 2019-09-07 | Horton  | Horton_02  |
| 48 | 20180704_075857_1044    | 2018-07-04 | Kolguev | Kolguev_01 |
| 49 | 20180708_075756_1011    | 2018-07-08 | Kolguev | Kolguev_01 |
| 50 | 20180801_075817_1021    | 2018-08-01 | Kolguev | Kolguev_01 |
| 51 | 20180923_080225_0f34    | 2018-09-23 | Kolguev | Kolguev_01 |
| 52 | 20180923_080226_0f34    | 2018-09-23 | Kolguev | Kolguev_01 |
| 53 | 20190628_064358_48_106a | 2019-06-28 | Kolguev | Kolguev_01 |
| 54 | 20190702_064217_29_1065 | 2019-07-02 | Kolguev | Kolguev_01 |
| 55 | 20190723_080937_103b    | 2019-07-23 | Kolguev | Kolguev_01 |
| 56 | 20190801_080518_1014    | 2019-08-01 | Kolguev | Kolguev_01 |
| 57 | 20190813_082918_17_105c | 2019-08-13 | Kolguev | Kolguev_01 |
| 58 | 20190814_080304_100c    | 2019-08-14 | Kolguev | Kolguev_01 |
| 59 | 20190819_080917_1012    | 2019-08-19 | Kolguev | Kolguev_01 |
| 60 | 20190822_081236_101f    | 2019-08-22 | Kolguev | Kolguev_01 |
| 61 | 20190903_075606_0e0f    | 2019-09-03 | Kolguev | Kolguev_01 |
| 62 | 20190907_081309_100c    | 2019-09-07 | Kolguev | Kolguev_01 |
| 63 | 20190702_050924_0f49    | 2019-07-02 | Kolguev | Kolguev_02 |
| 64 | 20190702_050925_0f49    | 2019-07-02 | Kolguev | Kolguev_02 |
| 65 | 20190723_080935_103b    | 2019-07-23 | Kolguev | Kolguev_02 |
| 66 | 20190723_080936_103b    | 2019-07-23 | Kolguev | Kolguev_02 |
| 67 | 20190813_082915_68_105c | 2019-08-13 | Kolguev | Kolguev_02 |
| 68 | 20190815_080515_0f4e    | 2019-08-15 | Kolguev | Kolguev_02 |
| 69 | 20190815_080516_0f4e    | 2019-08-15 | Kolguev | Kolguev_02 |
| 70 | 20190819_080913_1012    | 2019-08-19 | Kolguev | Kolguev_02 |
| 71 | 20190819_080914_1012    | 2019-08-19 | Kolguev | Kolguev_02 |
| 72 | 20190819_080915_1012    | 2019-08-19 | Kolguev | Kolguev_02 |
| 73 | 20190905_081012_1004    | 2019-09-05 | Kolguev | Kolguev_02 |
| 74 | 20190905_081013_1004    | 2019-09-05 | Kolguev | Kolguev_02 |
| 75 | 20190905_081014_1004    | 2019-09-05 | Kolguev | Kolguev_02 |
| 76 | 20190907_081306_100c    | 2019-09-07 | Kolguev | Kolguev_02 |
| 77 | 20190907_081307_100c    | 2019-09-07 | Kolguev | Kolguev_02 |
| 78 | 20190907_081308_100c    | 2019-09-07 | Kolguev | Kolguev_02 |
| 79 | 20190921_080320_1011    | 2019-09-21 | Kolguev | Kolguev_02 |
| 80 | 20190921_080321_1011    | 2019-09-21 | Kolguev | Kolguev_02 |
| 81 | 20190921_080322_1011    | 2019-09-21 | Kolguev | Kolguev_02 |
| 82 | 20180702_025400_0f31    | 2018-07-02 | Lena    | Lena_01    |
| 83 | 20180702_025401_0f31    | 2018-07-02 | Lena    | Lena_01    |
| 84 | 20180710_025407_101b    | 2018-07-10 | Lena    | Lena_01    |

|     |                         |            |             |                |
|-----|-------------------------|------------|-------------|----------------|
| 85  | 20180710_025408_101b    | 2018-07-10 | Lena        | Lena_01        |
| 86  | 20180716_025343_of35    | 2018-07-16 | Lena        | Lena_01        |
| 87  | 20180716_025344_of35    | 2018-07-16 | Lena        | Lena_01        |
| 88  | 20180722_025446_102e    | 2018-07-22 | Lena        | Lena_01        |
| 89  | 20180730_025452_1012    | 2018-07-30 | Lena        | Lena_01        |
| 90  | 20180829_025607_1034    | 2018-08-29 | Lena        | Lena_01        |
| 91  | 20180829_025608_1034    | 2018-08-29 | Lena        | Lena_01        |
| 92  | 20190606_030140_of3f    | 2019-06-06 | Lena        | Lena_01        |
| 93  | 20190606_030141_of3f    | 2019-06-06 | Lena        | Lena_01        |
| 94  | 20190607_001259_of44    | 2019-06-07 | Lena        | Lena_01        |
| 95  | 20190607_001300_of44    | 2019-06-07 | Lena        | Lena_01        |
| 96  | 20190618_013705_23_1062 | 2019-06-18 | Lena        | Lena_01        |
| 97  | 20190618_013707_30_1062 | 2019-06-18 | Lena        | Lena_01        |
| 98  | 20190628_030541_1027    | 2019-06-28 | Lena        | Lena_01        |
| 99  | 20190628_030542_1027    | 2019-06-28 | Lena        | Lena_01        |
| 100 | 20190715_000856_of2a    | 2019-07-15 | Lena        | Lena_01        |
| 101 | 20190715_000857_of2a    | 2019-07-15 | Lena        | Lena_01        |
| 102 | 20190716_014045_22_106a | 2019-07-16 | Lena        | Lena_01        |
| 103 | 20190719_030812_1006    | 2019-07-19 | Lena        | Lena_01        |
| 104 | 20190719_030813_1006    | 2019-07-19 | Lena        | Lena_01        |
| 105 | 20190722_030702_1039    | 2019-07-22 | Lena        | Lena_01        |
| 106 | 20190722_030703_1039    | 2019-07-22 | Lena        | Lena_01        |
| 107 | 20190727_030648_1040    | 2019-07-27 | Lena        | Lena_01        |
| 108 | 20190727_030649_1040    | 2019-07-27 | Lena        | Lena_01        |
| 109 | 20190731_000801_1053    | 2019-07-31 | Lena        | Lena_01        |
| 110 | 20190731_000802_1_1053  | 2019-07-31 | Lena        | Lena_01        |
| 111 | 20190803_000717_of49    | 2019-08-03 | Lena        | Lena_01        |
| 112 | 20190803_000718_of49    | 2019-08-03 | Lena        | Lena_01        |
| 113 | 20190815_030625_1001    | 2019-08-15 | Lena        | Lena_01        |
| 114 | 20190815_030626_1001    | 2019-08-15 | Lena        | Lena_01        |
| 115 | 20190829_030342_1006    | 2019-08-29 | Lena        | Lena_01        |
| 116 | 20190829_030343_1006    | 2019-08-29 | Lena        | Lena_01        |
| 117 | 20190831_030654_of35    | 2019-08-31 | Lena        | Lena_01        |
| 118 | 20190831_030655_of35    | 2019-08-31 | Lena        | Lena_01        |
| 119 | 20190913_030436_1005    | 2019-09-13 | Lena        | Lena_01        |
| 120 | 20190913_030437_1005    | 2019-09-13 | Lena        | Lena_01        |
| 121 | 20190916_030410_1010    | 2019-09-16 | Lena        | Lena_01        |
| 122 | 20190916_030411_1010    | 2019-09-16 | Lena        | Lena_01        |
| 123 | 20190610_201139_of15    | 2019-06-10 | Tuktoyaktuk | Tuktoyaktuk_01 |
| 124 | 20190610_201140_of15    | 2019-06-10 | Tuktoyaktuk | Tuktoyaktuk_01 |
| 125 | 20190620_201330_100a    | 2019-06-20 | Tuktoyaktuk | Tuktoyaktuk_01 |
| 126 | 20190620_201331_100a    | 2019-06-20 | Tuktoyaktuk | Tuktoyaktuk_01 |
| 127 | 20190620_201332_100a    | 2019-06-20 | Tuktoyaktuk | Tuktoyaktuk_01 |
| 128 | 20190703_201901_1006    | 2019-07-03 | Tuktoyaktuk | Tuktoyaktuk_01 |

|     |                         |            |             |                |
|-----|-------------------------|------------|-------------|----------------|
| 129 | 20190703_201902_1006    | 2019-07-03 | Tuktoyaktuk | Tuktoyaktuk_01 |
| 130 | 20190708_201059_101b    | 2019-07-08 | Tuktoyaktuk | Tuktoyaktuk_01 |
| 131 | 20190708_201100_101b    | 2019-07-08 | Tuktoyaktuk | Tuktoyaktuk_01 |
| 132 | 20190713_184804_64_1067 | 2019-07-13 | Tuktoyaktuk | Tuktoyaktuk_01 |
| 133 | 20190713_184806_71_1067 | 2019-07-13 | Tuktoyaktuk | Tuktoyaktuk_01 |
| 134 | 20190727_202025_1034    | 2019-07-27 | Tuktoyaktuk | Tuktoyaktuk_01 |
| 135 | 20190727_202026_1034    | 2019-07-27 | Tuktoyaktuk | Tuktoyaktuk_01 |
| 136 | 20190808_201538_1018    | 2019-08-08 | Tuktoyaktuk | Tuktoyaktuk_01 |
| 137 | 20190808_201539_1018    | 2019-08-08 | Tuktoyaktuk | Tuktoyaktuk_01 |
| 138 | 20190907_203545_84_105c | 2019-09-07 | Tuktoyaktuk | Tuktoyaktuk_01 |
| 139 | 20190928_201420_1035    | 2019-09-28 | Tuktoyaktuk | Tuktoyaktuk_01 |
| 140 | 20190928_201421_1035    | 2019-09-28 | Tuktoyaktuk | Tuktoyaktuk_01 |
| 141 | 20190928_201422_1035    | 2019-09-28 | Tuktoyaktuk | Tuktoyaktuk_01 |
